# Supplementary material for: Synthesis, structure and conformational mobility of tetra-substituted cyanomethoxy p-tert-butylcalix[4]arenes
Source: Royal Society of Chemistry journal article supplement (doi:10.1039/c6ra05865e), 2016-01-01
Supplement: c6ra05865e1.pdf [file c6ra05865e1.pdf]

**Synthesis, structure and conformational mobility of tetra-  
substituted cyanomethoxy *p*-*tert*-butylcalix[4]arenes**

Daniel D'Alessio, Anwen M. Krause-Heuer, Brian W. Skelton, Benjamin H. Fraser,  
Massimiliano Massi, and Mark I. Ogden

Supplementary Information

|                                                                                      |   |
|--------------------------------------------------------------------------------------|---|
| Conformational changes in DMSO solution measured by <sup>1</sup> H NMR integration.. | 2 |
| Molecular Figures for Structures of Calixarenes 3 – 7. ....                          | 4 |
| Hydrogen Bond Geometries .....                                                       | 9 |

Conformational changes in DMSO solution measured by  $^1\text{H}$  NMR integration.

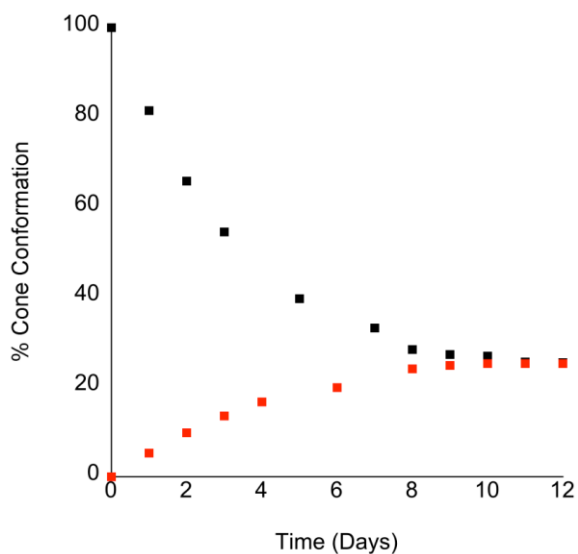

Figure S1. Percentage of cone conformation of 5,11,17,23-*tert*-butyl-25,26,27,28-tetrakis(cyanomethoxy)calix[4]arene present over time while heating in  $d_6$ -DMSO solution at  $150^\circ\text{C}$ , commencing with the cone conformer **2** (black) or partial cone **3** (red).

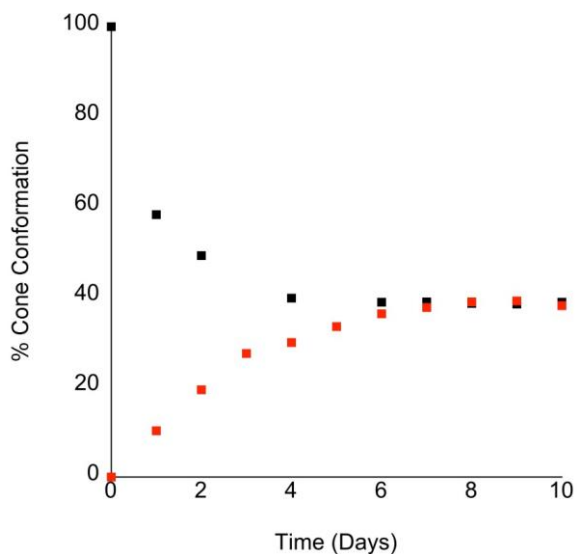

Figure S2. Percentage of cone conformation of 5,11,17,23-*tert*-butyl-25,27-bis(diethylcarbamoylmethoxy)-26,28-bis(cyanomethoxy)calix[4]arene present over time while heating in  $d_6$ -DMSO solution at  $150^\circ\text{C}$ , commencing with the cone conformer **4** (black) or partial cone **5** (red).

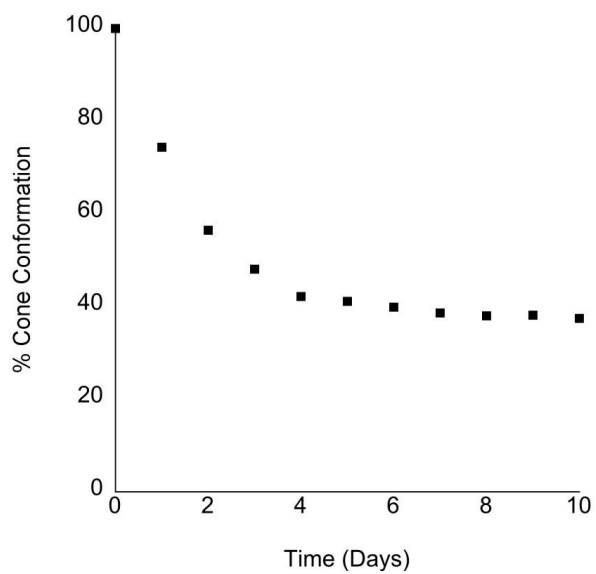

Figure S3. Percentage of cone conformation of 5,11,17,23-tetra-*tert*-butyl-25-diethylcarbamoylmethoxy-26,27,28-tris(cyanomethoxy)calix[4]arene present over time while heating in  $d_6$ -DMSO solution at 150° C, commencing with the cone conformer **7**.

### Figures for Structures of Calixarenes 3 – 7.

Ellipsoids have been drawn at the 50% probability level

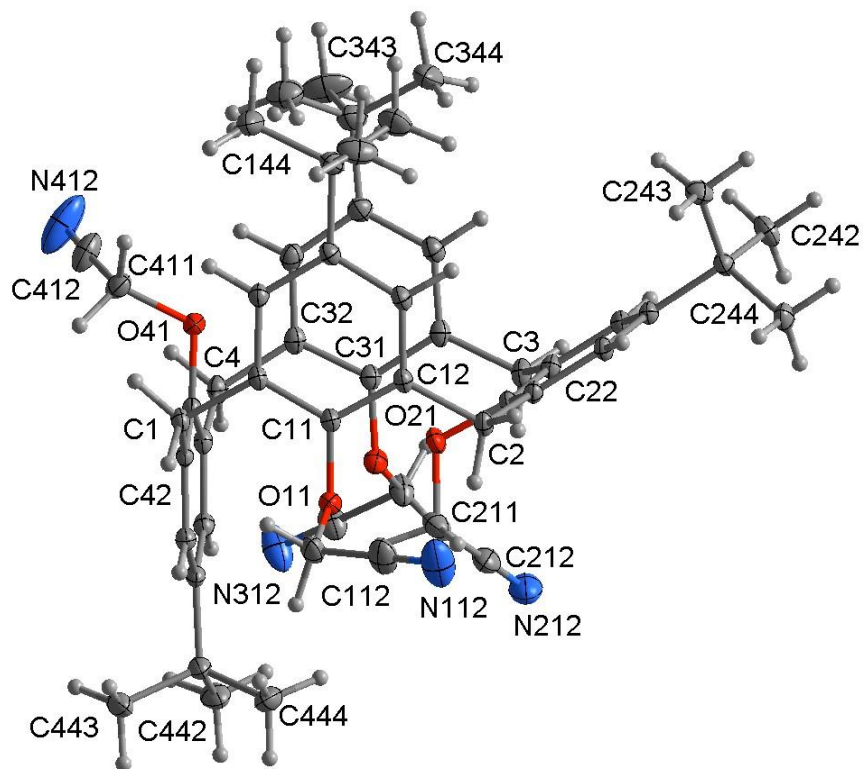

Figure S4 Molecular structure of **3**. One set of atoms of the disordered groups have been omitted for clarity.

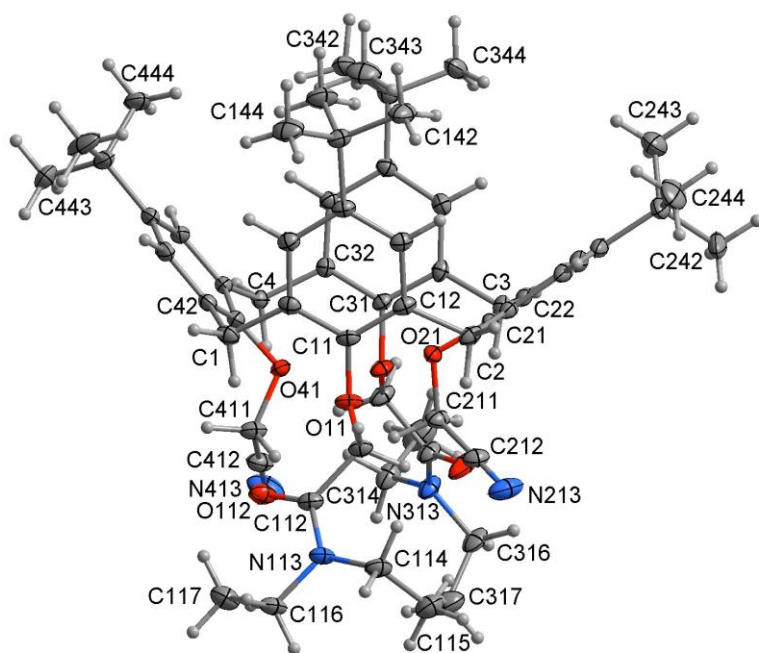

Figure S5. Molecular structure of molecule 1 of **4**. The minor components of the disorder have been omitted.

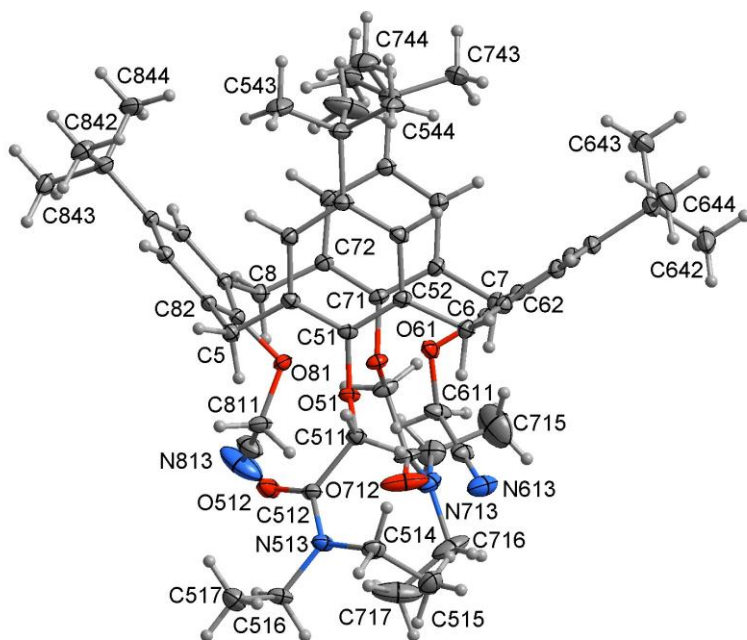

Figure S6. Molecular structure of molecule 2 of **4**. The minor components of the disorder have been omitted.

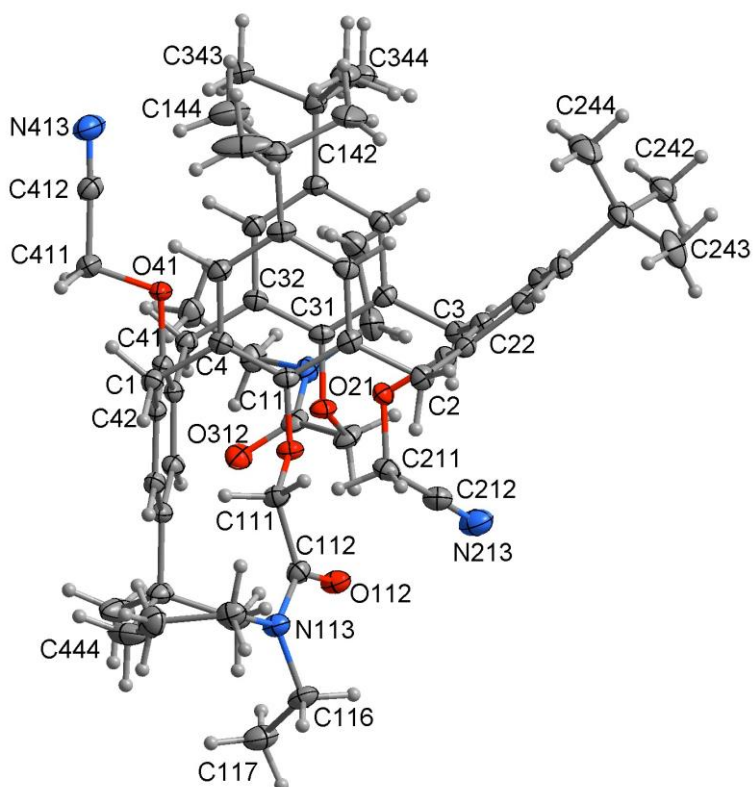

Figure S7. Molecular structure of **5** in **5**·EtOH.

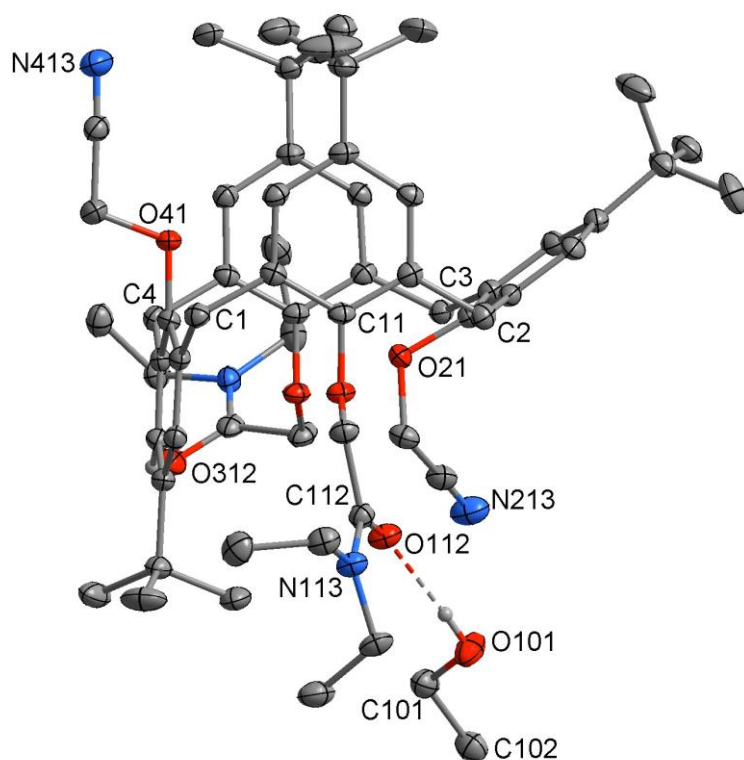

Figure S8. Structure of **5**·EtOH showing the hydrogen bonding to the ethanol solvent molecule.

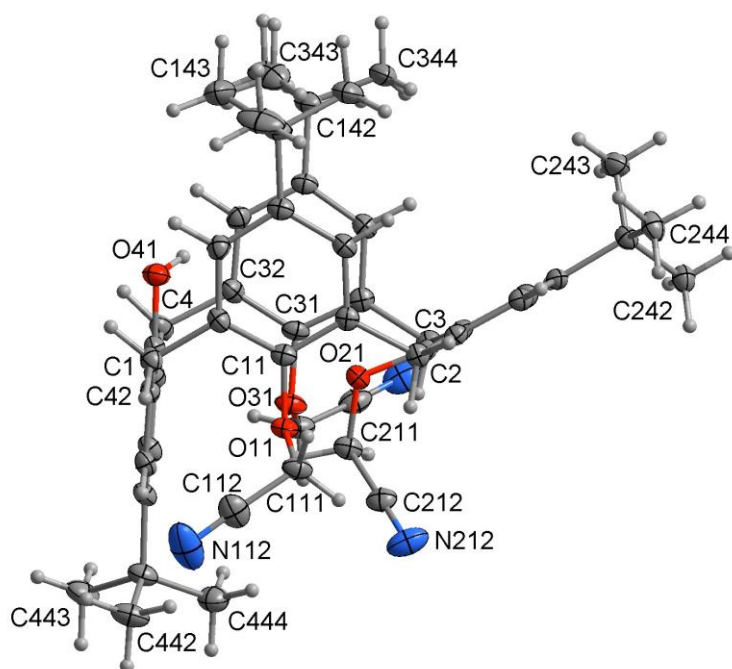

Figure S9. Molecular structure of **6**. The minor components of the disorder have been omitted.

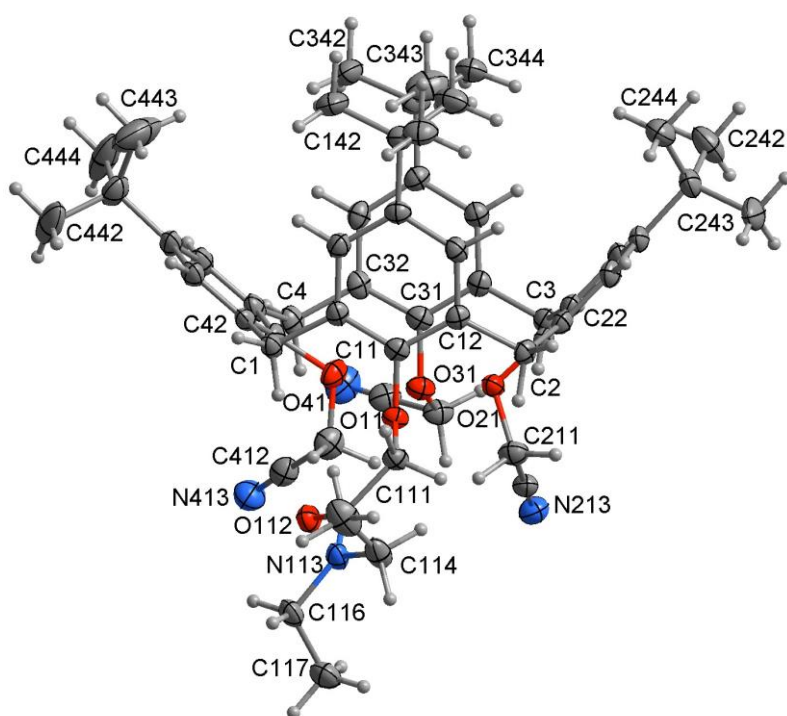

Figure S10. Molecular structure of **7** in **7·EtOH**.

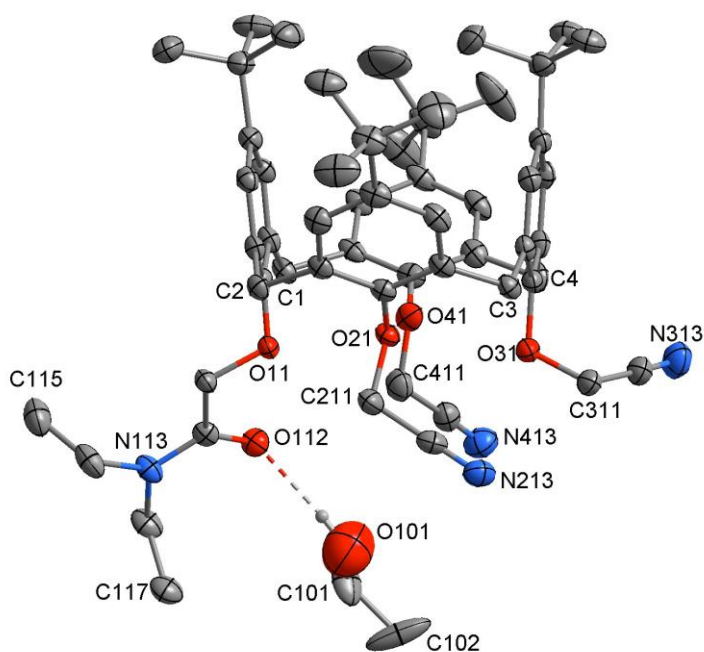

Figure S11. Structure of **7·EtOH** showing the hydrogen bonding to the ethanol solvent molecule.



## Hydrogen Bond Geometries

Table S1. Hydrogen bonds for **5**•EtOH [ $\text{\AA}$  and  $^\circ$ ].

| D-H...A                | d(D-H) | d(H...A) | d(D...A)   | $\angle(\text{DHA})$ |
|------------------------|--------|----------|------------|----------------------|
| O(101)-H(101)...O(112) | 0.84   | 1.94     | 2.7821(18) | 177.2                |

Table S2. Hydrogen bonds for **7**•EtOH [ $\text{\AA}$  and  $^\circ$ ].

| D-H...A                | d(D-H) | d(H...A) | d(D...A)  | $\angle(\text{DHA})$ |
|------------------------|--------|----------|-----------|----------------------|
| O(101)-H(101)...O(112) | 0.84   | 2.00     | 2.840(14) | 175.4                |
| O(201)-H(201)...O(112) | 0.84   | 2.04     | 2.812(5)  | 152.7                |
